# Supplementary material for: Smaller, Stronger, More Stable: Peptide Variants of a SARS-CoV-2 Neutralizing Miniprotein
Source: MDPI journal article supplement (doi:10.3390/ijms23116309), 2022-06-04
Supplement: s1 [file s1]

## Supplementary Materials

### Smaller, stronger, more stable: Peptide variants of a SARS-CoV-2 neutralizing miniprotein

Lucas Weißenborn <sup>1</sup>, Elie Richel <sup>2</sup>, Helena Hüseman <sup>1</sup>, Julia Welzer <sup>1</sup>, Silvan Beck <sup>1</sup>, Simon Schäfer <sup>3</sup>, Heinrich Sticht <sup>4</sup>, Klaus Überla <sup>2</sup> and Jutta Eichler <sup>1,\*</sup>

<sup>1</sup>Department of Chemistry and Pharmacy, Friedrich-Alexander-Universität Erlangen-Nürnberg, Germany

<sup>2</sup>Institute for Clinical and Molecular Virology; Universitätsklinikum Erlangen, Friedrich-Alexander-Universität Erlangen-Nürnberg, Germany

<sup>3</sup>Department of Biology, Genetics Division, Friedrich-Alexander-Universität Erlangen-Nürnberg, Germany

<sup>4</sup>Institute of Biochemistry, Friedrich-Alexander-Universität Erlangen-Nürnberg, Germany

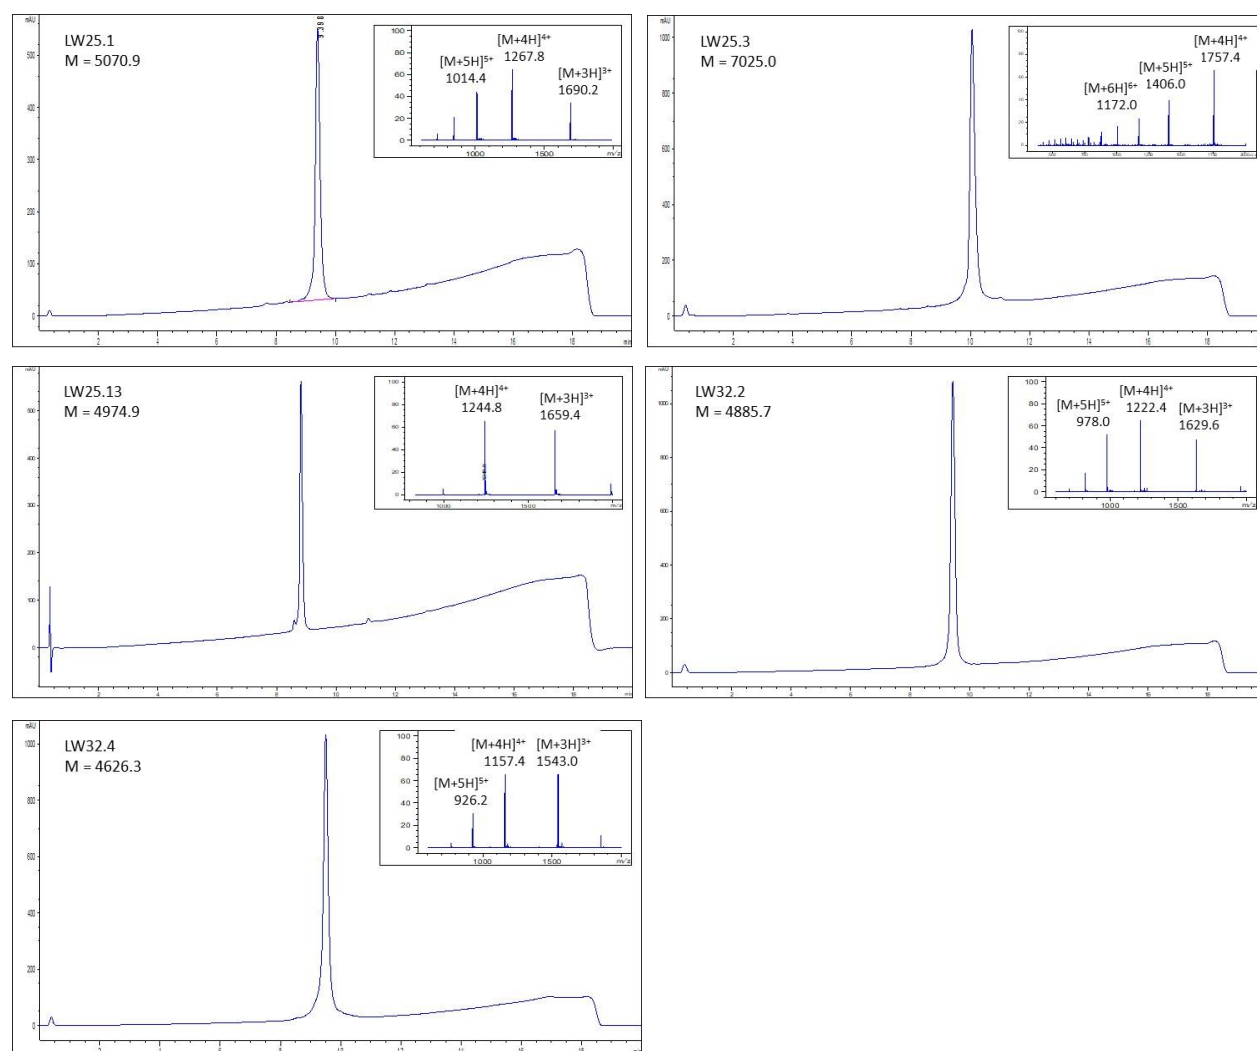

**Figure S1:** HPLC chromatograms and ESI-mass spectra (insets) of purified peptides.

**Table S1.** ESI-mass spectrometry data of LW32.4 variants.

| D-Scan  | Modification | MW calc. | [M+5H] <sup>5+</sup> | [M+4H] <sup>4+</sup> | [M+3H] <sup>3+</sup> |
|---------|--------------|----------|----------------------|----------------------|----------------------|
| LW33.1  | D1d          | 4626.391 | 926.4                | 1157.6               | 1543.2               |
| LW33.2  | K2k          | 4626.391 | 926.2                | 1157.6               | 1543.0               |
| LW33.3  | E3e          | 4626.391 | 926.2                | 1157.6               | 1543.2               |
| LW33.4  | W4w          | 4626.391 | 926.2                | 1157.6               | 1543.0               |
| LW33.5  | I5i          | 4626.391 | 926.4                | 1157.8               | 1543.2               |
| LW33.6  | L6l          | 4626.391 | 926.2                | 1157.6               | 1543.0               |
| LW33.7  | Q7q          | 4626.391 | 926.2                | 1157.6               | 1543.0               |
| LW33.8  | K8k          | 4626.391 | 926.2                | 1157.6               | 1543.0               |
| LW33.9  | I9i          | 4626.391 | 926.2                | 1157.6               | 1543.0               |
| LW33.10 | Y10y         | 4626.391 | 926.2                | 1157.6               | 1543.0               |
| LW33.11 | E11e         | 4626.391 | 926.2                | 1157.6               | 1543.0               |
| LW33.12 | I12i         | 4626.391 | 926.2                | 1157.6               | 1543.0               |
| LW33.13 | M13m         | 4626.391 | 926.2                | 1157.6               | 1543.0               |
| LW33.14 | R14r         | 4626.391 | 926.2                | 1157.4               | 1543.0               |
| LW33.15 | L15l         | 4626.391 | 926.2                | 1157.6               | 1543.0               |
| LW33.16 | L16l         | 4626.391 | 926.2                | 1157.6               | 1543.0               |
| LW33.17 | D17d         | 4626.391 | 926.2                | 1157.6               | 1543.0               |
| LW33.18 | E18e         | 4626.391 | 926.2                | 1157.6               | 1543.0               |
| LW33.19 | L19l         | 4626.391 | 926.2                | 1157.6               | 1543.0               |
| LW33.21 | H21h         | 4626.391 | 926.2                | 1157.6               | 1543.2               |
| LW33.22 | A22a         | 4626.391 | 926.2                | 1157.6               | 1543.2               |
| LW33.23 | E23e         | 4626.391 | 926.2                | 1157.6               | 1543.0               |
| LW33.24 | A24a         | 4626.391 | 926.4                | 1157.8               | 1543.2               |
| LW33.25 | S25s         | 4626.391 | 926.2                | 1157.6               | 1543.2               |
| LW33.26 | M26m         | 4626.391 | 926.2                | 1157.6               | 1543.0               |
| LW33.27 | R27r         | 4626.391 | 926.2                | 1157.6               | 1543.0               |
| LW33.28 | V28v         | 4626.391 | 926.2                | 1157.6               | 1543.2               |
| LW33.29 | S29s         | 4626.391 | 926.4                | 1157.6               | 1543.0               |
| LW33.30 | D30d         | 4626.391 | 926.2                | 1157.6               | 1543.2               |
| LW33.31 | L31l         | 4626.391 | 926.2                | 1157.4               | 1543.0               |
| LW33.32 | I32i         | 4626.391 | 926.2                | 1157.6               | 1543.2               |
| LW33.33 | Y33y         | 4626.391 | 926.2                | 1157.6               | 1543.0               |
| LW33.34 | E34e         | 4626.391 | 926.2                | 1157.6               | 1543.0               |
| LW33.35 | F35f         | 4626.391 | 926.2                | 1157.4               | 1543.0               |

| Ala-Scan | Modification | MW calc. | [M+5H] <sup>5+</sup> | [M+4H] <sup>4+</sup> | [M+3H] <sup>3+</sup> |
|----------|--------------|----------|----------------------|----------------------|----------------------|
| LW38.1   | D1A          | 4582.382 | 917.4                | 1146.6               | 1528.4               |
| LW38.2   | K2A          | 4569.295 | 914.8                | 1143.2               | 1524.0               |
| LW38.3   | E3A          | 4568.355 | 914.6                | 1143.0               | 1523.8               |
| LW38.4   | W4A          | 4511.256 | 903.2                | 1128.8               | 1504.8               |

|         |      |          |       |        |        |
|---------|------|----------|-------|--------|--------|
| LW38.5  | I5A  | 4584.310 | 917.8 | 1147.2 | 1529.0 |
| LW38.6  | L6A  | 4584.310 | 917.8 | 1147.0 | 1529.2 |
| LW38.7  | Q7A  | 4569.339 | 914.8 | 1143.4 | 1524.2 |
| LW38.8  | K8A  | 4569.295 | 914.8 | 1143.2 | 1524.0 |
| LW38.9  | I9A  | 4584.310 | 917.8 | 1147.2 | 1529.0 |
| LW38.10 | Y10A | 4534.294 | 907.8 | 1134.6 | 1512.4 |
| LW38.11 | E11A | 4568.355 | 914.6 | 1143.0 | 1523.8 |
| LW38.12 | I12A | 4584.310 | 917.8 | 1147.0 | 1529.2 |
| LW38.13 | M13A | 4566.277 | 914.2 | 1142.6 | 1523.0 |
| LW38.14 | R14A | 4541.281 | 909.4 | 1136.4 | 1514.8 |
| LW38.15 | L15A | 4584.310 | 917.8 | 1147.0 | 1529.2 |
| LW38.16 | L16A | 4584.310 | 917.8 | 1147.0 | 1529.0 |
| LW38.17 | D17A | 4582.382 | 917.4 | 1146.6 | 1528.2 |
| LW38.18 | E18A | 4568.355 | 914.6 | 1143.0 | 1523.6 |
| LW38.19 | L19A | 4584.310 | 917.8 | 1147.0 | 1528.8 |
| LW38.20 | G20A | 4640.418 | 929.0 | 1164.0 | 1547.6 |
| LW38.21 | H21A | 4560.328 | 913.2 | 1141.0 | 1521.2 |
| LW38.22 | E23A | 4568.355 | 914.6 | 1143.0 | 1523.6 |
| LW38.23 | S25A | 4610.392 | 923.0 | 1153.6 | 1537.6 |
| LW38.24 | M26A | 4566.277 | 914.2 | 1142.6 | 1522.8 |
| LW38.25 | R27A | 4541.281 | 909.2 | 1136.2 | 1514.4 |
| LW38.26 | V28A | 4598.377 | 920.6 | 1150.6 | 1533.6 |
| LW38.27 | S29A | 4610.392 | 923.0 | 1153.4 | 1537.6 |
| LW38.28 | D30A | 4582.382 | 917.4 | 1146.6 | 1528.2 |
| LW38.29 | I32A | 4584.310 | 917.8 | 1147.0 | 1528.8 |
| LW38.30 | Y33A | 4534.294 | 907.8 | 1134.6 | 1512.2 |
| LW38.31 | E34A | 4568.355 | 914.6 | 1143.0 | 1523.6 |
| LW38.32 | F35A | 4550.293 | 911.0 | 1138.4 | 1517.6 |

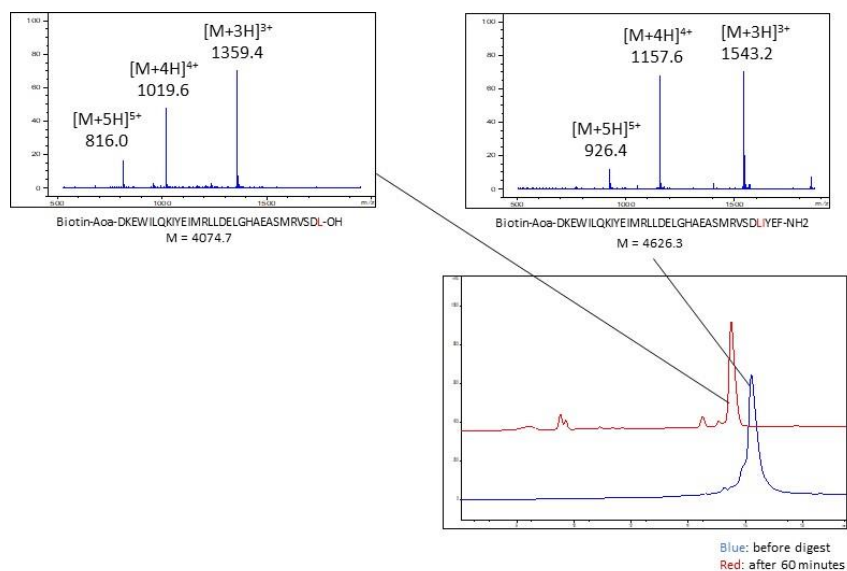

**Figure S2.** HPLC chromatogram and ESI-mass spectra of LW32.4 before and after pepsin digest.

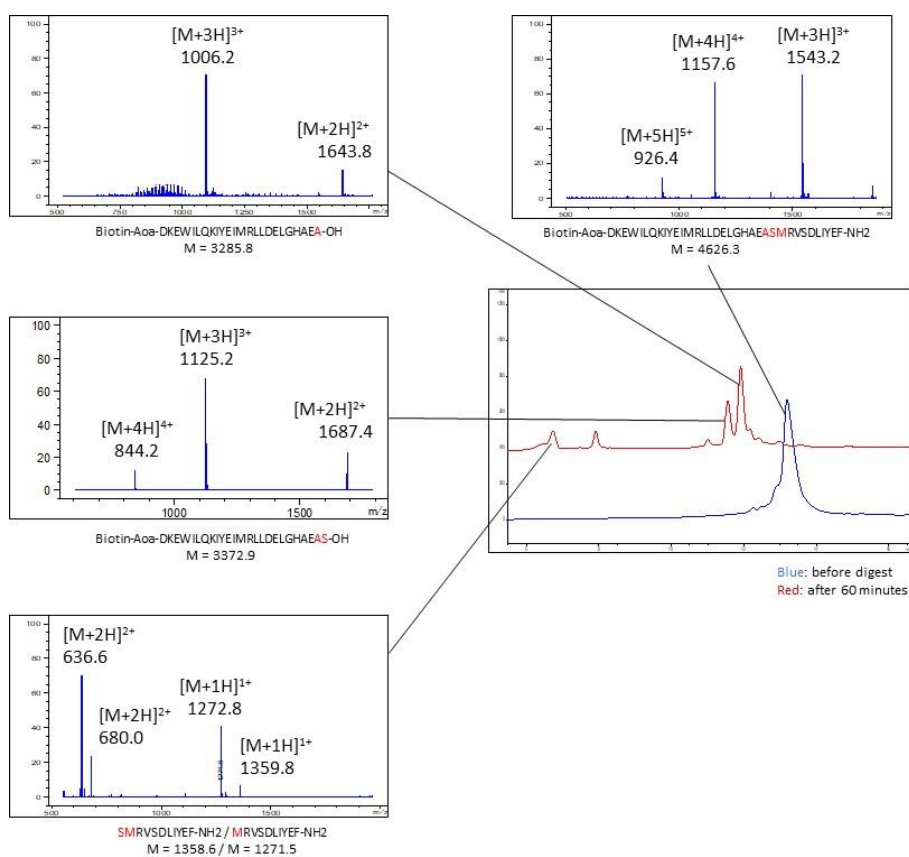

**Figure S3.** HPLC chromatogram and ESI-mass spectra of LW32.4 before and after neutrophil elastase digest.
